## RESEARCH ARTICLE

# Reductive tetrachloroethene dehalogenation in the presence of oxygen by *Sulfurospirillum multivorans*: physiological studies and proteome analysis

Jennifer Gadkari<sup>1,#</sup>, Tobias Goris<sup>1,\*,#</sup>, Christian L. Schiffmann<sup>1,#,†</sup>,  
Raffael Rubick<sup>1,2</sup>, Lorenz Adrian<sup>3,4</sup>, Torsten Schubert<sup>1</sup> and Gabriele Diekert<sup>1</sup>

<sup>1</sup>Institute for Microbiology, Friedrich Schiller University, Philosophenweg 12, 07743 Jena, Germany, <sup>2</sup>Scienova GmbH, Spitzweidenweg 30, 07743 Jena, Germany, <sup>3</sup>Helmholtz Centre for Environmental Research – UFZ, Department Isotope Biogeochemistry, Permoserstraße 15, 04318 Leipzig, Germany and <sup>4</sup>Technische Universität Berlin, Fachgebiet Geobiotechnologie, Ackerstraße 76, 13355 Berlin, Germany

\*Corresponding author: Institute for Microbiology, Friedrich Schiller University, Philosophenweg 12, 07743 Jena, Germany Tel.: +49 (0) 3641-949300; Fax: +49 (0) 3641-949302; E-mail: [tobias.goris@uni-jena.de](mailto:tobias.goris@uni-jena.de)

One sentence summary: Opposed to other organohalide-respiring bacteria, *Sulfurospirillum multivorans* is able to reductively dechlorinate tetrachloroethene to cis-dichloroethene under low oxygen concentrations

#These authors contributed equally to this work.

†Present address: Department of Psychiatry and Psychotherapy, University Medical Center Göttingen, Von-Siebold Str. 3a, 37075 Göttingen, Germany.

Editor: Christof Holliger

## ABSTRACT

Reductive dehalogenation of organohalides is carried out by organohalide-respiring bacteria (OHRB) in anoxic environments. The tetrachloroethene (PCE)-respiring Epsilonproteobacterium *Sulfurospirillum multivorans* is one of few OHRB able to respire oxygen. Therefore, we investigated the organism's capacity to dehalogenate PCE in the presence of oxygen, which would broaden the applicability to use *S. multivorans*, unlike other commonly oxygen-sensitive OHRB, for bioremediation, e.g. at oxic/anoxic interphases. Additionally, this has an impact on our understanding of the global halogen cycle. *Sulfurospirillum multivorans* performs dehalogenation of PCE to cis-1,2-dichloroethene at oxygen concentrations below 0.19 mg/L. The redox potential of the medium electrochemically adjusted up to +400 mV had no influence on reductive dehalogenation by *S. multivorans* in our experiments, suggesting that higher levels of oxygen impair PCE dechlorination by inhibiting or inactivating involved enzymes. The PCE reductive dehalogenase remained active in cell extracts of *S. multivorans* exposed to 0.37 mg/L oxygen for more than 96 h. Analysis of the proteome revealed that superoxide reductase and cytochrome peroxidase amounts increased with 5% oxygen in the gas phase, while the response to atmospheric oxygen concentrations involved catalase and hydrogen peroxide reductase. Taken together, our results demonstrate that reductive dehalogenation by OHRB is not limited to anoxic conditions.

**Keywords:** oxygen respiration; anaerobic respiration; reactive oxygen species; organohalide respiration; bioremediation; oxic/anoxic chemocline

## INTRODUCTION

Halogenated organic groundwater contaminants (e.g. chlorinated ethenes) are dehalogenated by various aerobic and anaerobic microorganisms (Fetzner 1998). Aerobic bacteria dehalogenate organohalides via oxidation reactions using different enzymes (van Pée and Unversucht 2003), whereas anaerobic bacteria often use halogenated compounds as terminal electron acceptors in an anaerobic respiration, in which they couple reductive dehalogenation to energy conservation. This process, termed organohalide respiration (OHR), involves corrinoid-containing reductive dehalogenases as terminal reductase (Leys, Adrian and Smidt 2013; Schubert and Diekert 2016). Organohalide-respiring bacteria (OHRB) are mainly found within the phyla Chloroflexi (*Dehalococcoides* and *Dehalogenimonas*), Firmicutes (*Dehalobacter* and *Desulfotobacterium*), Deltaproteobacteria (e.g. *Geobacter*, *Anaeromyxobacter*, *Desulfomonile*) and Epsilonproteobacteria (*Sulfurospirillum*) (Atashgahi, Lu and Smidt 2016). Chlorinated ethenes are widely occurring as groundwater contaminants (Moran, Zogorski and Squillace 2007). While chlorinated ethenes with one or two chlorine substituents (vinyl chloride (VC) and dichloroethenes (DCE)) can be dechlorinated oxidatively under oxic conditions (Coleman et al. 2002; Mattes, Alexander and Coleman 2010), tetrachloroethene (PCE) is persistent to microbial degradation in the presence of oxygen but is transformed via reductive dechlorination catalyzed by OHRB (Atashgahi, Lu and Smidt 2016). Although formerly described as an obligate anaerobic bacterium (Scholz-Muramatsu et al. 1995), *Sulfurospirillum multivorans* was recently shown to be able to respire oxygen at low O<sub>2</sub> concentrations (Goris et al. 2014). This is an exception among OHRB. Most of these bacteria are sensitive to even very low amounts of oxygen, especially obligate organohalide respirers such as *Dehalococcoides mccartyi* (Amos et al. 2008). Besides *S. multivorans* also *Anaeromyxobacter dehalogenans*, a Deltaproteobacterium dechlorinating 2-chlorophenol, but not PCE, is an OHRB respiring oxygen (Sanford, Cole and Tiedje 2002; Thomas et al. 2008). Additionally, *Desulfotobacterium dehalogenans* and *D. hafniense* DCB-2 were described to survive in the presence of air (Madsen and Licht 1992; Utkin, Woese and Wiegel 1994) and to encode proteins responsible for reactive oxygen species (ROS) detoxification (Kim et al. 2012). A few other aerobic bacteria mainly belonging to the Betaproteobacteria (e.g. *Delftia* sp. EOB-17 and *Comamonas* sp. 7D-2) carry out reductive dehalogenation (but not OHR) under oxic conditions; however, they seem to exclusively dehalogenate brominated aromatic compounds (Chen et al. 2013, 2015). Microbial reductive dechlorination of PCE has been shown to be performed only under anoxic conditions at environmental redox potentials below -180 mV (Kästner 1991). The oxygen sensitivity of this process can be partly explained by the low stability of reductive dehalogenases in the presence of oxygen, the enzymatic half-life ranging from 1 to 4 h under atmospheric oxygen concentrations (Holliger, Wohlfarth and Diekert 1998). This oxygen sensitivity is most likely due to the instability of [4Fe-4S] clusters (Imlay 2006) also present in the PCE reductive dehalogenase of *S. multivorans* (Bommer et al. 2014).

Soil and groundwater, which are often contaminated with chlorinated ethenes, are heterogeneous with respect to their oxygen concentration and include microoxic zones. We use the term microoxic to refer to dissolved oxygen concentrations of less than 2 mg/L (corresponding to ~5% oxygen in the gas phase). In this study, we addressed the question if reductive dechlorination could be catalyzed by *S. multivorans* in the presence of oxygen, since this would enhance the practicability of

bioremediation in microoxic contaminated environments (e.g. at oxic/anoxic interphases or in microoxic aquifers). As a comparison, the PCE-dechlorinating, oxygen-tolerating *D. hafniense* Y51 was tested for PCE dechlorination in the presence of oxygen. Since little is known about the physiological reaction of microaerobic OHRB or Epsilonproteobacteria in general to oxygen, we also investigated the cellular response of *S. multivorans* to oxygen by analyzing the organism's proteome.

## MATERIALS AND METHODS

### Cultivation

*Sulfurospirillum multivorans* (DSMZ 12446) was cultivated under anoxic conditions at 28°C in a defined mineral medium (Scholz-Muramatsu et al. 1995) without vitamin B<sub>12</sub> (cyanocobalamin). *Desulfotobacterium hafniense* Y51 was cultivated in the same medium but with 0.2% (w/v) yeast extract. Pyruvate (40 mM) was used as electron donor, oxygen and/or PCE as electron acceptor. PCE was added to the medium (10 mM nominal concentration, corresponding to ~200 µM in the aqueous phase) from a hexadecane stock solution (0.5 M, resulting in a hexadecane to medium ratio of 2% (v/v)). The initial content of oxygen was measured with a manometer by adding the required amount of pure oxygen to bottles containing a gas phase of 1 bar nitrogen. The starting culture for all experiments contained *S. multivorans* cultivated for 60 transfers on pyruvate (40 mM) and fumarate (40 mM) plus 0.2% yeast extract, resulting in a downregulated PCE respiration gene expression (John et al. 2009; Goris et al. 2015). For adaptation and to avoid transfer of remaining substrates, three sequential pre-cultures were cultivated in rubber-stoppered 200-mL glass serum bottles with a ratio of gas to liquid phase of 1:1 and with the same electron acceptor used in the experiment (i.e. PCE or oxygen). For the experiments, the medium was inoculated with the pre-cultures (10%) and the cultures were cultivated in rubber-stoppered glass bottles (Fig. 1A). Gas to liquid phase ratio was 9:1 in 2-L bottles containing cultures with oxygen (Linde AG, Leuna, Germany) or 1:1 with PCE as terminal electron acceptor. The cultures were shaken at 150 rpm at 28°C.

When investigating the oxygen stress response of *S. multivorans*, oxygen was added to the gas phase of exponentially growing cells with PCE as electron acceptor to a final amount of 5% or 20% oxygen. Cultivation was then continued for 6.5 h until harvesting. To analyze the proteome after induction with PCE, *S. multivorans* cells cultivated for at least 60 transfers with fumarate as sole electron acceptor were transferred to medium with pyruvate/PCE (three replicates harvested in the exponential growth phase) or pyruvate/PCE plus 1.86 mg/L oxygen (5% oxygen in the gas phase, six bottles). Three of the latter bottles were harvested when the oxygen concentration in the medium was consumed to <0.17 mg/L. The remaining three cultures were harvested after PCE dechlorination had started, as measured by cDCE production. The cultivation of *S. multivorans* with PCE in the presence of constant oxygen concentrations was performed as follows. First, a culture of *S. multivorans* (100 ml) cultivated with PCE was harvested under anoxic conditions. The resulting cell pellet was washed twice with anoxic buffer (100 mM Tris-HCl pH 7.5) to get rid of residual chlorinated ethenes. The cells were then resuspended in 100 ml medium containing pyruvate (40 mM) without PCE. This cell suspension served as inoculum for the cultures (10 ml pyruvate/PCE medium in 50 ml Erlenmeyer flasks closed with loose aluminum caps to allow gas exchange) to achieve an initial OD<sub>578</sub> of 0.05 to 0.08. The cultures were incubated at 28°C

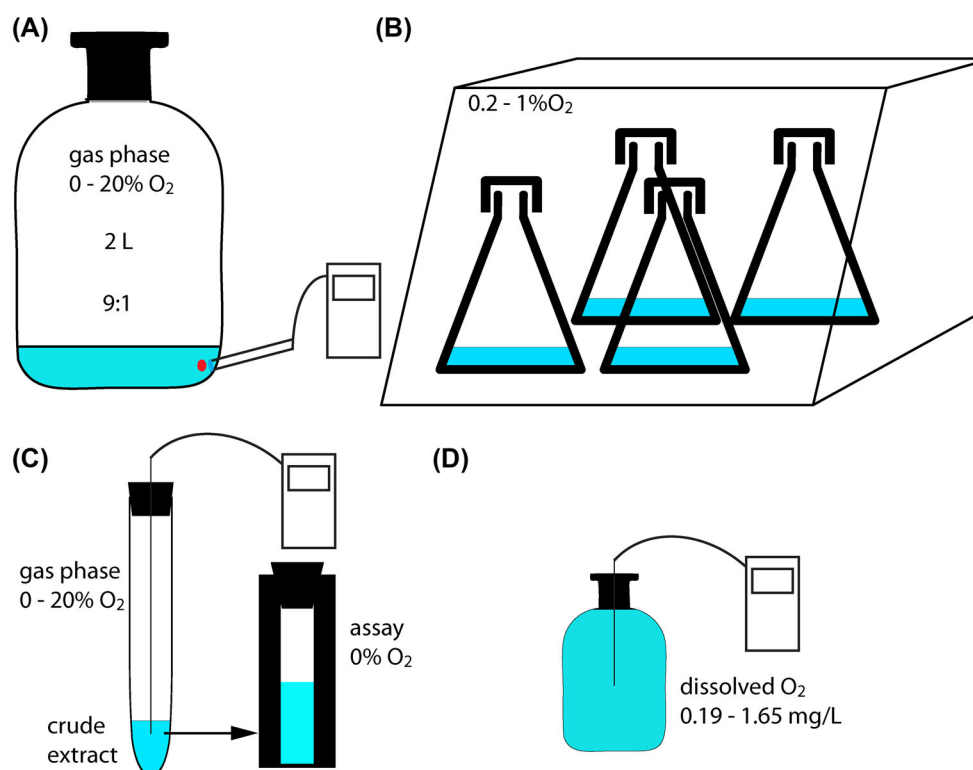

**Figure 1.** Schematic overview of cultivation conditions and methods applied. (A) Cells cultivated in 2-L bottles for proteomics and PCE dechlorination in the presence of oxygen measured with optode spots. (B) Cells cultivated in Erlenmeyer flasks closed with aluminum caps in hypoxic station. (C) Photometric PCE dechlorination assay to measure oxygen stability of crude extracts. (D) Cell suspension experiment to elucidate the effect of dissolved oxygen on PCE dechlorination.

under rigorous shaking (360 rpm) in a Whitley H35 hypoxystation (Don Whitley Scientific, UK) with a nitrogen atmosphere containing 0.2%, 0.5% or 1% oxygen (Fig. 1B). When the experiment was performed with *D. hafniense* Y51, the medium contained yeast extract (0.2%). Over a period of 6 h, samples were taken hourly for the quantification of chlorinated ethenes. Uninoculated medium-containing flasks treated the same way served as control for PCE evaporation during incubation.

Bacterial growth was monitored photometrically by measuring the optical density at 578 nm or by the determination of the protein concentration with the Bio-Rad reagent (Bio-Rad Laboratories, München, Germany) using the Bradford assay (Bradford 1976). Bovine serum albumin was used as standard. All cultivations were performed in triplicates, except where stated otherwise. Growth phases were determined by plotting the growth curves to semilogarithmic scales.

### Cell harvesting and sample preparation

*Sulfurospirillum multivorans* cells were harvested by centrifugation ( $12\,000 \times g$ , 10 min at 10°C). The cell pellets were washed once in 50 mM Tris-HCl (pH 7.5) and resuspended (2 ml per g wet weight) in the same buffer containing ~20 mg DNase I (AppliChem, Darmstadt, Germany) and ~40 mg of protease inhibitor (cComplete Mini, EDTA-free; Roche, Mannheim, Germany). The cells were disrupted using a French Press (6.9 MPa = 1000 psi). Cell debris was removed by centrifugation ( $6000 \times g$ , 10 min at 4°C). Protein was precipitated using acetone and 50 µg was used for further analysis. Protein pellets were resuspended in 5× sample buffer (0.31 M Tris-HCl pH 6.8; 10% sodium dodecyl-

sulphate (SDS) (w/v); 30% glycerol (v/v); 25% mercaptoethanol (v/v), 0.05% bromophenol blue (w/v) and denatured for 10 min at 66°C. SDS polyacrylamide gel electrophoresis was carried out in a 12.5% acrylamide gel over a running distance of 2 cm. Lanes were cut, destained, and proteins reduced and alkylated as described before (Goris et al. 2016) prior to digest with trypsin (Promega, Madison, WI, USA) overnight at 37°C. Extracted peptides were desalted using ZipTip-µC18 material (Merck Millipore, Darmstadt, Germany). After evaporation of solvents under vacuum, samples were resuspended in 0.1% formic acid containing 2% acetonitrile before liquid chromatography coupled mass spectrometry (LC-MS/MS) analysis.

### Mass spectrometry and proteome data analysis

Mass spectrometric analysis was performed as described previously (Goris et al. 2015, 2016). In short, an Ultimate 3000 nanoRSLC system (Thermo Scientific, Germering, Germany) was used to separate peptides with a 90-min gradient. After electron spray ionization, peptide masses were analyzed in an Orbitrap Fusion mass spectrometer (Thermo Scientific, San Jose, CA, USA) operated in data-dependent mode. Further details of the applied method can be found in the supplementary materials section (Supporting Information).

LC-MS/MS data were analyzed using Proteome Discoverer (v1.4.1.14, Thermo Scientific). MS/MS spectra were searched against the *S. multivorans* database containing 3191 non-redundant protein-coding sequence entries (NCBI Genbank, accession number CP007201.1) using the SEQUEST HT and MS Amanda search engines with the following settings: trypsin as

cleaving enzyme, oxidation of methionine as dynamic and carbamidomethylation of cysteine as static modification, up to two missed cleavages, MS mass tolerance set to 10 ppm and MS/MS mass tolerance to 0.05 Da. False discovery rate for peptides was set to <0.01 (Table S1, Supporting Information). Quantification of proteins was performed using the average of top 3 peptide area (Bondarenko, Chelius and Shaler 2002) as implemented in ProteomDiscoverer 1.4. Protein quantification was considered successful for proteins detected in >50% of biological replicates, otherwise they were classified as identified but not quantified proteins. After log<sub>10</sub> transformation, the protein abundance values were normalized to the median and bioinformatic analysis was applied by principal component analysis and t-test statistics (R). Significance threshold  $P < 0.05$  in a two-tailed test were considered as significantly altered.

### Tetrachloroethene reductive dehalogenase (PceA) activity measurement in crude cell extracts

The cultures were harvested in the exponential growth phase (as determined by growth curve recording) by centrifugation ( $12\,000 \times g$ , 10 min at 10°C). The cells were resuspended in 2 volumes (ml/g biomass) of anoxic buffer (100 mM Tris-HCl pH 7.5, made anoxic via 30 vacuum/nitrogen flush cycles) and disrupted using a French Press (6.9 MPa = 1000 psi). Defined amounts of the cell extracts were transferred to anoxic vials (nitrogen atmosphere) closed with rubber stoppers (Fig. 1C). In the vials, different oxygen concentrations (0%, 1%, 2.5% and 5%) were adjusted by transferring defined amounts of air into the gas phase with a syringe. For 20% oxygen in the gas phase, the nitrogen atmosphere in the vial was replaced with air. The oxygen concentration in the medium and gas phase was monitored with a Microx4 oxygen meter (PreSense-Precision Sensing GmbH, Regensburg, Germany). Vials were incubated at 28°C under stirring. At defined time points, the activity of PceA was measured as described earlier using a photometric assay with Tris-HCl buffer pH 7.5, containing methyl viologen reduced by titanium(III) citrate, as artificial electron donor (Neumann, Wohlfarth and Diekert 1996). Specific activity values are given as nkat/mg or U/mg (1 U = 1 μmol per min).

### PCE dechlorination in cell suspensions (resting cells)

A defined mineral medium (Scholz-Muramatsu et al. 1995) with pyruvate (40 mM) was used, but without resazurin, cysteine, iron and trace element solution to prevent bacterial growth. The experiment was conducted in 200-mL rubber-stoppered glass serum bottles. To adjust specific oxygen concentrations in the reaction medium (0%, 2.5%, 5% and 7.5% oxygen), air was injected with a syringe to a 100-ml medium. To equilibrate the oxygen concentrations of the gas and liquid phases, the bottles were shaken rigorously (300 rpm) for 6 h. The medium of two bottles (1:1 gas:liquid phase) was then combined in one bottle for the experiment to ensure a gas phase as small as possible (Fig. 1D). PCE (200 μM) was dissolved in the medium by stirring overnight. To ensure a constant reaction temperature, the bottles were pre-incubated for 1 h at 28°C. Afterwards, 5% of an exponentially growing *S. multivorans* or *D. hafniense* Y51 culture was added. The inoculum was resuspended in buffer beforehand to minimize the transfer of nutrients. The bottles were incubated at 28°C while stirring. Samples were taken every 20 min and analyzed for chlorinated ethenes; growth was determined at the beginning and at the end of the experiment.

### Immunoblot analysis

From all biological replicates used in the proteome analysis, 10 μg protein was subjected to denaturing SDS-PAGE (12.5%) and afterwards blotted onto a polyvinylidene difluoride membrane (Roche) using a semidry transfer cell (Bio-Rad) according to the protocol described by John et al. (2009). The PceA antiserum (primary antibody) was diluted 500 000-fold. The primary antibody was detected via a secondary antibody (diluted 1:20 000) coupled to alkaline phosphatase (Sigma-Aldrich, Munich, Germany).

### Analysis of metabolites

Dechlorination of PCE was monitored by gas phase GC-FID analysis of culture samples using a Clarus 500 gas chromatograph as described in Mac Nelly et al. (2014). Detection limit of chlorinated ethenes was 0.5 μM. The oxygen concentration in the medium and in the gas phase during oxygen respiration in 2-L bottles was measured via fluorescence intensity changes of oxygen-sensitive optode spots (POF-PfSt3, Presens, Regensburg, Germany) and a corresponding detection device from the same company (Fibox 3 LCD trace v7, Fig. 1A).

In other experiments, the oxygen concentration was measured with the Microx4 oxygen meter and a needle-type oxygen microsensor NTH-PSt7 (PreSense-Precision Sensing GmbH, Fig. 1C and D). Temperature was measured in separate bottles to calculate the oxygen concentration in the medium. The measurement range of the oxygen sensor was from 0% to 100% (0–45 mg/L) oxygen. The optode spots had a detection limit of 15 μg/L (0.03%) dissolved oxygen, the microsensor NTH-PSt7 of 10 μg/L (0.02%).

### Redox measurements and redox potential adjustment

The redox potential of the medium in growing cultures (40 mM formate as electron donor, 5 mM acetate as carbon source and 10 mM PCE in a hexadecane phase as electron acceptor) was adjusted using a 3-electrode-potentiostat (Wenking LB 81 M, Bank Elektronik, Göttingen, Germany) with a graphite working electrode. For the detailed experimental set-up see Fig. S1 (Supporting Information). The potential was measured against a Ag<sup>+</sup>/AgCl reference electrode (Ref100, Unisense A/S, Århus, Denmark) with a standard potential of +207 mV. Redox potentials in the medium were measured with a redox electrode (Pt4800-M5-S7, Mettler Toledo, Gießen, Germany). Before inoculation, the medium was made anoxic (30 vacuum/flush cycles with nitrogen) and adjusted to a defined redox potential of either -600, -200, +200 or +400 mV. Incubation temperature was 28°C. During cultivation, the redox potential of the medium was adjusted and kept constant at the given value by the potentiostat under anoxic conditions.

## RESULTS

### Proteome response to oxygen respiration compared to PCE respiration

In a previous study, *Sulfurospirillum multivorans* was shown to grow with O<sub>2</sub> as terminal electron acceptor and an O<sub>2</sub> concentration of 5% proved optimal for growth (Goris et al. 2014). To identify proteins of the oxygen respiratory chain or involved in stress response to ROS, the proteomes of *S. multivorans* cells cultivated with either PCE or O<sub>2</sub> (5% in the gas phase) were analyzed and compared. The protein abundance value (mean of top 3 peptide area) of 35 quantified proteins differed significantly

**Table 1.** Level changes of selected proteins involved in oxygen respiration, redox reactions, stress response to 5% oxygen or stress response to atmospheric oxygen concentration.

| Locus tag SMUL | Description                                              | 1                                       | 2                                                      |
|----------------|----------------------------------------------------------|-----------------------------------------|--------------------------------------------------------|
|                |                                                          | 5% O <sub>2</sub> vs PCE<br>Fold change | 20% O <sub>2</sub> vs 5% O <sub>2</sub><br>Fold change |
| 0150           | Cytochrome c domain-containing integral membrane protein | 5.9                                     | 1.0                                                    |
| 0195–0203      | NADH ubiquinone oxidoreductase                           | –1.9 to 1.4                             | –2.6 to –1.1                                           |
| 0333           | Cold shock protein CspA                                  | –1.6                                    | 1.9                                                    |
| 0342           | Polysulfide reductase, subunit A                         | 5.2                                     | 1.5                                                    |
| 0510–0520      | NADH-ubiquinone oxidoreductase                           | –1.2 to 1.8                             | –2.1 to 1.2                                            |
| 0529           | Superoxide dismutase [Fe]                                | 1.8                                     | 1.1                                                    |
| 0547           | Heat shock protein Hsp20                                 | –6.4                                    | –1.0                                                   |
| 0575           | Cytochrome c551 peroxidase                               | 11.1                                    | 1.7                                                    |
| 0667           | Malate:quinone oxidoreductase                            | 1.2                                     | –1.1                                                   |
| 0950           | Molybdopterin oxidoreductase                             | 22.2                                    | –                                                      |
| 0987           | Heat shock protein 60 family co-chaperone GroES          | 1.2                                     | 1.5                                                    |
| 1334           | Putative superoxide reductase                            | 3.8                                     | –3.1                                                   |
| 1033–1036      | Lactate utilization proteins ABC                         | 3.7 to 7.6                              | –3.7 to –3.5                                           |
| 1443           | Malate dehydrogenase                                     | 2.6                                     | 1.8                                                    |
| 1459           | Fumarate hydratase class II                              | 3.4                                     | 1.0                                                    |
| 1679–1680      | Fumarate hydratase class I                               | 1.3–1.5                                 | –2.0 to –1.6                                           |
| 1703           | Pyruvate dehydrogenase [ubiquinone]                      | 7.8                                     | 1.2                                                    |
| 1963           | Putative heat shock protein HspR                         | –6.4                                    | –1.5                                                   |
| 2521–2523      | Ubiquinol-cytochrome c reductase                         | 1.7 to 2.0                              | –3.08 to –2.26                                         |
| 2652–2654      | Cbb3-type cytochrome c oxidase subunit                   | 1.6                                     | –2.7 to –1.7                                           |
| 3084           | Superoxide dismutase [Cu-Zn]                             | 2.4                                     | 1.2                                                    |
| 3225           | Alkyl hydroperoxide reductase protein C                  | 1.4                                     | 6.2                                                    |
| 3224           | Catalase                                                 | –                                       | +                                                      |

Proteins marked in orange are significantly up- or downregulated (fold change of  $\pm 2.82$ ,  $P$ -value  $\leq 0.05$ ).

–: not detected. + : quantified only with 20% O<sub>2</sub>.

between the two different growth conditions (Table S1, data sheet S3 and Fig. S2A, Supporting Information), while the variance of the datasets from three replicates was low (Fig. S3A, Supporting Information). The proteins encoded by genes in the OHR region were found to be present exclusively in PCE-cultivated cells. The catalytic subunit of a molybdopterin oxidoreductase of the uncharacterized MopB3 family (SMUL.950) was the protein with the highest increase in the presence of oxygen compared to PCE (22-fold, Table 1). Two proteins putatively involved in oxygen-related stress response were also found to be present in higher amounts with oxygen: a cytochrome c551 peroxidase belongs to one of the most differentially quantified proteins (SMUL.0575, 11-fold), while the amount of a putative superoxide reductase was 4-fold increased (SMUL.1334, Table 1). An uncharacterized cytochrome c-like membrane protein (encoded by SMUL.150) with 445 amino acid residues and 8 transmembrane helices showed higher abundance in oxygen-cultivated cells than in PCE-cultivated cells (6-fold higher,  $P$ -value 0.002). The main enzyme complexes involved in oxygen respiration, *cbb*<sub>3</sub>-type cytochrome c oxidase (encoded by SMUL.2652–2655) and cytochrome c reductase (*bc*<sub>1</sub> complex, encoded by SMUL.2521–2525) were found in similar amounts in the two compared proteomes (see Table 1 and Table S1, data sheet S2, Supporting Information), indicating a constitutive production.

### Proteome response of cells exposed to atmospheric oxygen concentrations

Next, we tested the impact of 6.5 hours exposure to 20% oxygen compared to exposure to 5% oxygen on the proteome of PCE-cultivated *S. multivorans* cells. The growth of cultures exposed to 5% oxygen was similar to that of control cultures

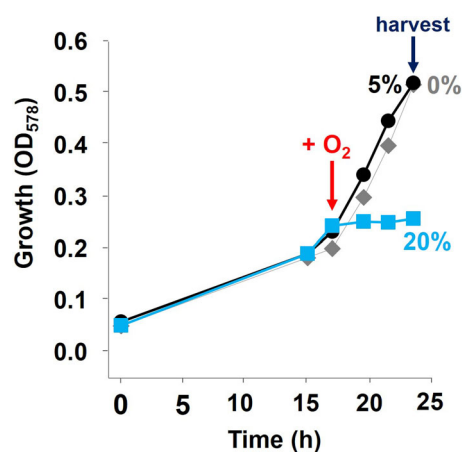

**Figure 2.** Stress response of *S. multivorans* to atmospheric oxygen concentrations after cultivation with PCE. Cells were supplied with either 5% or 20% oxygen in the gas phase in the exponential phase. After further 6.5 h, both cultures were harvested for proteomics. Gray diamonds represent the growth curve of the control culture without oxygen supplement.

(pyruvate/PCE without oxygen), while the culture exposed to 20% oxygen stopped growing (Fig. 2). The dechlorination ceased after O<sub>2</sub> addition (data not shown). Eighteen proteins were significantly regulated when comparing both conditions. Four of these were found to be more abundant when cells were exposed to 20% oxygen (Table S1, data sheet S4, Supporting Information). Of these four proteins, one is predicted to be functionally related to oxygen stress response, an alkyl hydroperoxide reductase AhpC (SMUL.3225) with 6.2-fold higher amounts than in

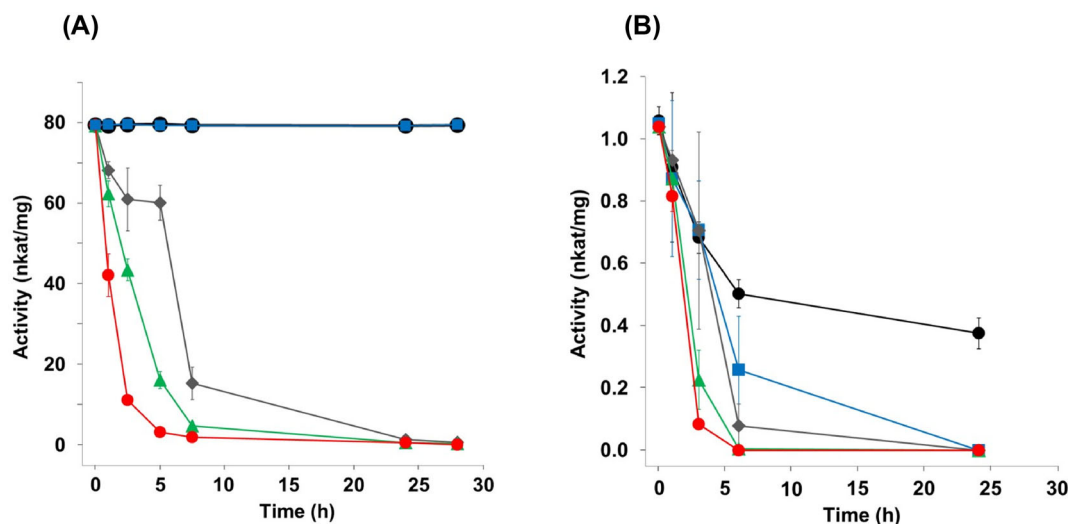

Figure 3. Activity of the reductive dehalogenase PceA of *S. multivorans* and *D. hafniense* Y51 in the presence of different oxygen concentrations applied to crude extracts before measurement. (A) PceA activity of crude extracts of *S. multivorans*. (B) PceA activity of crude extracts of *D. hafniense* Y51. The crude extracts were incubated at 28°C under stirring and were exposed to the oxygen concentrations indicated. Black dots, without O<sub>2</sub>; blue squares, 0.37 mg/L O<sub>2</sub>; gray diamonds, 0.93 mg/L O<sub>2</sub>; green triangles, 1.86 mg/L O<sub>2</sub>; red dots, 7.44 mg/L O<sub>2</sub>.

cells exposed to 5% oxygen (Table 1). A catalase, not detected in any other proteome investigated in this study, was detected at low levels (abundance of 6.8, in the lowest quartile of quantified proteins) in cells incubated with 20% oxygen.

The two superoxide dismutases encoded by *S. multivorans* SMUL\_0529 (Fe-type) and SMUL\_3084 (Cu-Zn-type) were found in similar amounts. The first one is among the top 25% of proteins from cells cultivated with 5% oxygen (value of 8.5), and the latter among the bottom 30% (7.0). Several proteins involved in oxygen respiration, e.g. the bc<sub>1</sub> complex and the cytochrome c oxidase, were found to be downregulated in cells exposed to 20% oxygen.

### PCE dechlorination by cell extracts and resting cells in the presence of oxygen

Since the proteome data showed that the oxygen respiratory chain proteins are also expressed under PCE-respiring conditions, oxygen might be consumed at the membrane of *S. multivorans*. This rapid oxygen reduction could protect oxygen-labile proteins involved in PCE respiration, which might allow the latter to proceed even when cells are cultivated in the presence of oxygen. Therefore, we examined the oxygen sensitivity of PCE dechlorination in cell extracts and resting cells obtained from cultures cultivated with PCE. Since the activity assays of reductive dehalogenases are dependent on artificial electron donors, which would be immediately oxidized by oxygen, we incubated crude extracts of *S. multivorans* in reaction buffer without electron donor, but containing different amounts of oxygen. PceA activities from samples taken at defined time points after starting the incubation were measured using reduced methyl viologen as artificial electron donor (redox potential  $E^{\circ\prime} = -446$  mV). The initial PceA activity for all experiments was  $\sim 80$  nkat mg<sup>-1</sup> (4.8 U/mg) (Fig. 3A). At atmospheric oxygen concentrations, the enzymatic activity half-life was about 2 h, comparable to that reported for the purified enzyme (Neumann et al. 1996). However, when lowering the oxygen concentration to 1% in the gas phase, the activity was stable and comparable to that with 0% oxygen (Fig. 3A) and the PCE dechlorination remained constant for about 96 h (data not shown).

Since it was reported that *Desulfitobacterium* spp. can tolerate low amounts of oxygen (Madsen and Licht 1992; Utkin, Woese and Wiegel 1994), the same experiment was repeated with cell extracts of the PCE-dechlorinating *Desulfitobacterium hafniense* Y51. Even in the absence of oxygen, the enzyme was not stable in crude extracts, losing 50% of its dehalogenation activity after 6 h (Fig. 3B). In cell extracts incubated with 1% oxygen in the gas phase (dissolved oxygen 0.37 mg/L), the enzymatic half-life was 3 h, indicating a much lower PceA stability in *D. hafniense* Y51 compared to PceA in cell extracts of *S. multivorans*.

To investigate PCE dechlorination under oxic conditions in cell suspensions (resting cells), *S. multivorans* cells were transferred into a pyruvate/PCE/oxygen-containing solution similar to the growth medium, but lacking essential supplements to prevent growth. Cell suspensions without oxygen were used as positive control. Initial oxygen concentrations 0.932, 1.864 or 2.796 mg/l in the medium were applied. The dechlorination of PCE started in cell suspensions ( $\sim 20$   $\mu$ g/ml cell protein) without oxygen directly after the inoculation of the reaction mixture with *S. multivorans* (Fig. 4A). In contrast, in cell suspensions with oxygen the dechlorination of PCE did not start before oxygen was depleted to concentrations below 0.19 mg/l (0.5%) (Fig. 4B). The oxygen concentration in the medium decreased to a constant level of  $\sim 0.1$  mg/ml as measured with a needle-type oxygen microsensors (see Materials and Methods section). The oxygen concentration in the control with anoxic medium was below the detection limit (0.01 mg/ml).

The cell suspension experiments were also performed with *D. hafniense* Y51 cells ( $\sim 15$   $\mu$ g/ml cell protein). With initial oxygen concentrations of 5% and 7.5%, neither the oxygen nor the PCE concentration decreased. When using lower oxygen concentrations of 1% or 2.5%, a decrease of oxygen to  $<0.03\%$  or  $0.7\%$ , respectively, was measured. In the experiment with an initial oxygen concentration of 1%, PCE dechlorination was only observed after oxygen was depleted (Fig. S4, Supporting Information). An increase in biomass, as determined at the beginning and at the end point of the experiment, was not observed in both *D. hafniense* and *S. multivorans*.

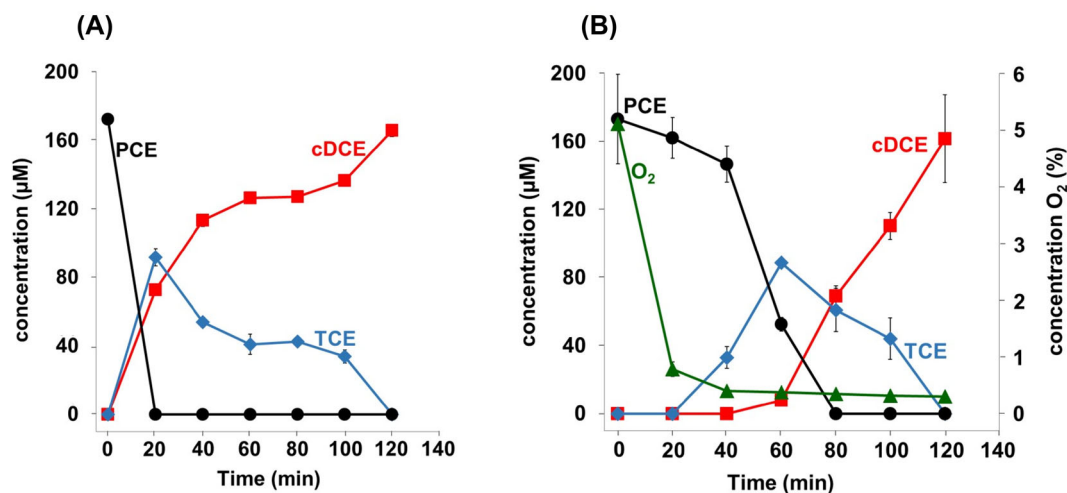

**Figure 4.** Dechlorination of PCE by cell suspensions of *S. multivorans* in the presence of different oxygen concentrations. (A) Dechlorination of PCE and formation of cDCE and TCE in the absence of oxygen. (B) Dechlorination of PCE and formation of cDCE and TCE as well as the consumption of oxygen. The initial oxygen concentration was 5% in the gas phase (as measured to be 1.86 mg/L in the medium); the protein concentration was 12–20 µg/ml.

### PCE dechlorination by growing cells in the presence of oxygen

To assess if PCE can be dehalogenated under oxic conditions by growing *S. multivorans* cells, the organism was cultivated with O<sub>2</sub> concentrations of 5%, 2% and 1% in the gas phase corresponding to measured aqueous concentrations of 1.86, 0.746 and 0.373 mg/L, respectively (Fig. 1A). PCE dechlorination was not detected at oxygen concentrations of 5% or 2%, even after oxygen consumption due to respiration (data not shown). With 1% initial oxygen in the gas phase, the cells started to dechlorinate PCE as soon as the oxygen concentration dropped to less than about 0.5% within about 2 h (Fig. 5). Obviously, it was not possible to maintain constant oxygen concentrations in these bottles, despite the large gas phase. Moreover, the used optode spots did not allow for accurate measurement of oxygen concentrations in the medium below 0.2 mg/L. Therefore, cultures were incubated in flasks in the hypoxystation at defined constant oxygen concentrations of 0.2%, 0.5% or 1% in a second approach (Fig. 1B). The formation of the PCE dechlorination products trichloroethene (TCE) and cDCE was observed up to an oxygen concentration of 0.5% but not at 1%. Product formation started approximately 1 h after starting the experiment. The quantification of PCE dechlorination was not possible, since a major portion of the chlorinated ethenes evaporated under the experimental conditions applied. All four replicates showed formation of cDCE and TCE at an oxygen concentration of 0.2%, while TCE was the only dechlorination product detected in two of the four samples at an oxygen concentration of 0.5%. From these observations, it can be concluded that *S. multivorans* is able to dechlorinate PCE at oxygen concentrations of up to ~0.5% in the gas phase, corresponding to 0.19 mg/L dissolved oxygen in the liquid phase. *Desulfotobacterium hafniense* Y51 did not dechlorinate PCE in the presence of any of the tested oxygen concentrations in both experimental set-ups.

The redox potential of the growth medium with 5% oxygen was measured to be ~ +230 mV (E' vs the hydrogen electrode; data not shown). Since it was not known whether oxygen or the redox potential or both affect the organism's ability to respire PCE, the influence of the redox potential on PCE respiration was tested in the absence of oxygen. The redox potential in the range

of –600 to +400 mV as applied by potentiostat had no significant effect on growth or PCE dechlorination as detected by cDCE formation (Fig. 6).

### Induction of PCE respiration in the presence of oxygen

The influence of oxygen exposure on induction of PCE respiration in OHR-downregulated cells was investigated by inoculating OHR-downregulated cells (cultivated without PCE for more than 60 transfers) in medium containing 10 mM PCE only or PCE plus oxygen (5%) as electron acceptor. The latter cultures reached the stationary phase within 88 h and reached an optical density of about 0.47. At this time point, three of six cultures fed with oxygen and PCE were harvested for proteomic and biochemical studies (designated O<sub>2</sub> early) and the other three cultures were further incubated and harvested later (O<sub>2</sub> late) (Fig. 7B). PCE dechlorination started approximately at the same time in both cultures (160 h for PCE/5% oxygen and 135 h for PCE only) (Fig. 7A and B). After another 48 h, when PCE was completely depleted in the PCE only culture (=exponential growth phase) (Fig. 7A) and 72% of the PCE was depleted in the O<sub>2</sub> late culture (Fig. 7B), both cultures were harvested. In all samples, PceA was monitored by western blot analysis and enzymatic PCE dechlorination activity. Active reductive dehalogenase PceA was detected in all cultures harvested after 183 h of cultivation, although at a much lower level in the PCE/oxygen-cultivated cells as shown in a western blot of the respective cultures (Fig. 7).

In the proteome, the samples of cells harvested early (O<sub>2</sub> early) showed a wider distribution of the replicates in the principle component analysis compared to the samples harvested at the second time point (Fig. S5, Supporting Information). This can most likely be attributed to the heterogeneity of the cultures harvested early in the stationary phase of the oxygen-amended cultures.

In cultures harvested directly after oxygen consumption (O<sub>2</sub> early), only PceA, the two-component response regulator (SMUL\_1539) and a putative FMN-binding protein (SMUL\_1575) were quantified from the OHR core region, in which the PCE respiration proteins are clustered (Fig. 8, Table S1, data sheet S5 and S7, Supporting Information). While the response

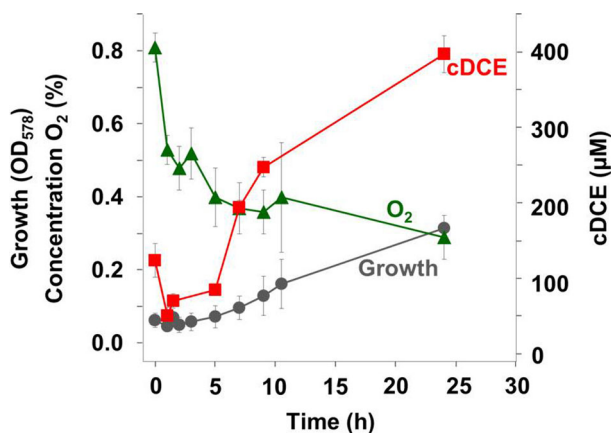

Figure 5. Dechlorination of PCE by cultivating *S. multivorans* cells in the presence of oxygen. Product (cDCE) formation and growth of *S. multivorans* with pyruvate as electron donor and PCE as electron acceptor in the presence of oxygen (initial concentration in the gas phase 1%, 0.373 mg/L O<sub>2</sub> in the medium). The experiment was performed in duplicates. The higher initial cDCE concentration is caused by carrying over cDCE from the pre-culture which subsequently dissolved in the medium.

regulator (SMUL.1539) was detected in similar amounts as in cells cultivated with PCE as sole electron acceptor, the reductive dehalogenase PceA and the FMN-binding protein were quantified in more than 100-fold lower amounts. In the O<sub>2</sub> late cells, nine proteins of the OHR region (PceA, the regulator, an IscU-like protein and seven proteins inside or downstream of the corrinoid biosynthesis gene cluster) were quantified in contrast to 28 proteins encoded by this region in cells cultivated with PCE only (Fig. 8, Table S1, data sheet S7, Supporting Information). Additionally, seven corrinoid biosynthesis proteins were identified in one replicate. Seven of the nine quantified OHR proteins were upregulated (5 to 16-fold) in cells cultivated with PCE only compared to the O<sub>2</sub> late cells (Fig. 8, Table S1, data sheets S5 and S6).

## DISCUSSION

### Response of *Sulfurospirillum multivorans* to oxygen

The terminal oxidase used by *S. multivorans* for oxygen respiration is a *ccb3*-type cytochrome oxidase, known for its high affinity to oxygen (Pitcher, Brittain and Watmugh 2002). This enzyme is most likely constitutively expressed, as suggested by its high protein abundance levels not only with oxygen, but also in the presence of PCE (this study), fumarate or nitrate (Goris et al. 2015) as electron acceptors. *Anaeromyxobacter dehalogenans* encodes for a similar *ccb3*-type cytochrome oxidase (Thomas et al. 2008), putatively used by this OHRB for its microaerobic lifestyle. *Desulfitobacterium hafniense* Y51 instead contains a cluster encoding a putative cytochrome *bd* oxidase (DSY4054–4056) known for their low oxygen affinity (Borisov et al. 2011). The presence of this enzyme might be responsible for the observed oxygen consumption in *D. hafniense* Y51 cell extracts. The two other putative terminal oxidases (*bd*- and *bo3*-type) encoded by *S. multivorans* (Goris et al. 2014) were not detected in any proteome data and might serve other functions not related to the presence of oxygen. The oxygen-dependent upregulation of another cytochrome *c*-like protein and a molybdopterin oxidoreductase with unknown function might hint to their role in oxygen respiration or oxygen stress response in *S. multivorans*.

While *S. multivorans* is able to grow with 5% oxygen in the gas phase, atmospheric concentrations of oxygen inhibit growth of

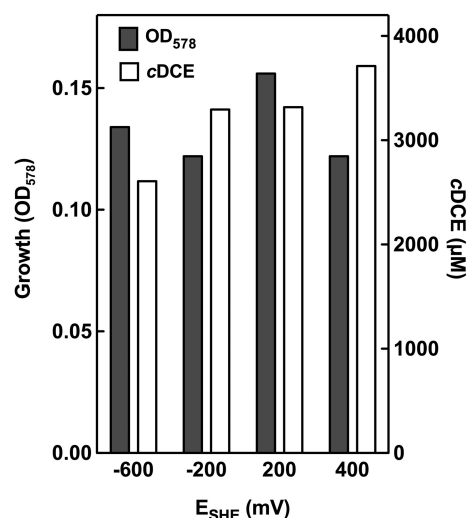

Figure 6. Redox potential-dependent dechlorination of PCE to cDCE in *S. multivorans* cultures. During cultivation (formate/acetate/PCE), the redox potential of the medium was kept constant at the desired value. After 20 h of cultivation, OD and cDCE were determined.

this microaerobic bacterium. The most likely explanation for the growth inhibition might be the high concentration of ROS in cells confronted with 20% oxygen. This is reflected in the proteome response of *S. multivorans* cells exposed to atmospheric oxygen concentrations. On the one hand, cells incubated with 20% oxygen stopped growing and exhibited a shutdown of catabolic enzymes that might produce ROS. On the other hand, different enzymes potentially scavenging ROS are found in the proteome of these cells. The major ROS-scavenging enzymes are superoxide dismutase (SOD), superoxide reductases (SOR), catalase and cytochrome *c* peroxidase (Ccp) (Ezraty et al. 2017), all of which are encoded in the genome of *S. multivorans*. *Desulfitobacterium hafniense* Y51 and DCB-2 encode three of these four ROS-scavenging enzymes; they lack a gene encoding SOR. However, only catalase gene expression was induced in strain DCB-2 after exposure to oxygen (Kim et al. 2012). Two of the ROS-scavenging enzymes seem to be upregulated with 5% oxygen in *S. multivorans*, Ccp and a putative SOR. The latter reduce superoxide to hydrogen peroxide (Sheng et al. 2014), while Ccps are assumed to catalyze the conversion of hydrogen peroxide to water when cells are stressed with oxygen (Atack and Kelly 2007). With 20% oxygen, catalase, another enzyme reducing hydrogen peroxide, was detected. This is in line with observations in *Escherichia coli*, where catalase is recruited when hydrogen peroxide levels are high (Imlay 2013). Besides the catalase, AhpC is upregulated with 20% oxygen. AhpC is described as the peroxide-reducing protein of the alkyl hydroperoxide reductase system (La Carbona et al. 2007), which convert hydrogen peroxide and organic hydroperoxides to water and the corresponding alcohols, respectively (Wood et al. 2003). Of the two types of SODs, the Fe-type SOD may be the main superoxide anion radical scavenger, since it was found in larger amounts in all *S. multivorans* proteomes than the Cu-Zn SOD.

### Reductive dechlorination of PCE in the presence of oxygen

Besides *Anaeromyxobacter dehalogenans*, *S. multivorans* is the only described microaerobic OHRB. (Sanford, Cole and Tiedje 2002; Goris et al. 2014) However, only the latter respire halogenated



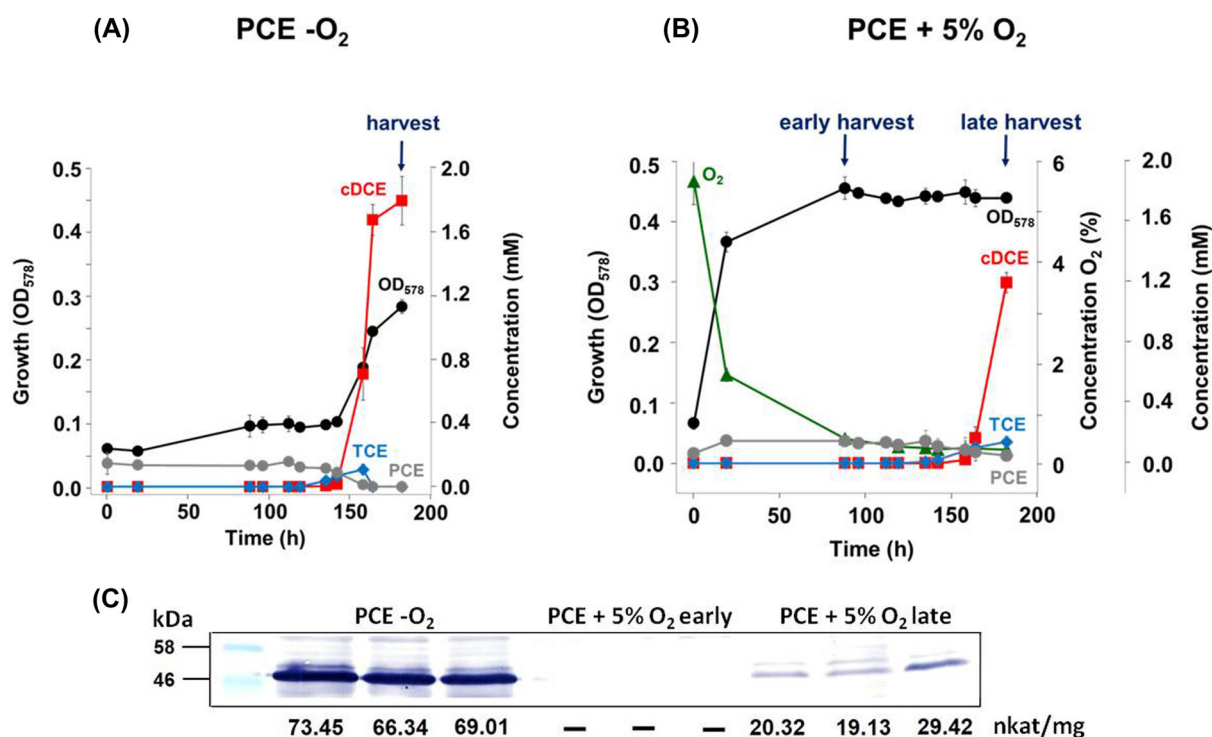

**Figure 7.** Induction of PCE respiration in the presence of oxygen. For the induction of organohalide respiration in *S. multivorans* in the presence of oxygen, cells with downregulated PCE respiration were used (see Materials and Methods section). Pyruvate served as electron donor for all cultures. (A) As control, three cultures were amended with PCE as sole electron donor. (B) Six cultures were supplied with PCE + 5% O<sub>2</sub>. Three of these cultures were harvested earlier in the stationary phase (early), while the other three cultures were harvested in the late stationary phase (late) when the cells had started PCE dechlorination. PCE dechlorination start is indicated by a red arrow, harvesting time points are indicated by dark-blue arrows. Black dots, growth curve; gray dots, PCE; blue diamonds, TCE; red squares, cDCE; green triangles, oxygen. There is no apparent stoichiometry between PCE and cDCE concentration due to the different solubility of the two chlorinated ethenes. (C) Western blot and PCE-dechlorinating activities of crude cell extracts.

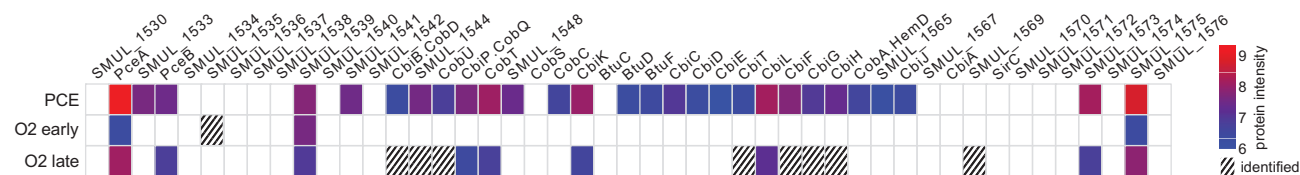

**Figure 8.** Identified gene products of the OHR core region as detected by proteomic analysis. Each square correlates to a given gene product identified or quantified under given cultivation/experimental condition (at the left). For quantified proteins, the protein intensity is provided (color code at the far right, normalized and logarithmized average of top 3 peptide area as described in the Materials and methods section), proteins identified but not quantified are represented by shaded squares.

alkenes and therefore might be also able to reductively dehalogenate PCE and TCE in the presence of oxygen. However, the quantification of reductive dechlorination of PCE in the presence of low amounts of oxygen was difficult to achieve: Besides the technical difficulties in precise oxygen measurements, cultivation of *S. multivorans* with PCE and oxygen in closed bottles resulted in the rapid consumption of oxygen. The threshold of oxygen concentration, at which PCE dechlorination became possible, could only be roughly determined this way. A constant supply of oxygen in the medium was reached via cultivation of *S. multivorans* in open flasks, but this made the quantification of the volatile chlorinated ethenes impossible. Therefore, we gathered results of three different experiments involving PCE dechlorination measurement under oxygen. The combined results point toward the reductive dehalogenation being mediated at up to about 0.19 mg/L oxygen. This might be ecologically relevant in the oxic-anoxic interphase of PCE-contaminated environments. Above 0.19 mg/L oxygen, PCE dechlorination was

inhibited. A fast downregulation of PceA could be excluded, since the downregulation of this enzyme takes ~100 generations, when fumarate, nitrate and oxygen are used as sole electron acceptors instead of PCE (John et al. 2009; Goris et al. 2015, unpublished data). Additionally, the induction of the OHR gene region of PceA downregulated *S. multivorans* cells was not much slower with additional oxygen as electron acceptor. Cell extracts of *S. multivorans* containing the key enzyme of the reductive dehalogenation, the corrinoid and Fe-S cluster-containing PceA exhibited a tolerance to 1% oxygen for at least 48 h. Therefore, the reported sensitivity of PceA toward oxygen (Neumann, Wohlfarth and Diekert 1996) might be not the only limiting factor in PCE dechlorination in the presence of oxygen. The oxygen instability of PceA is most likely due to an effect on its two [4Fe-4S] clusters, which often convert to other forms when exposed to oxygen (Imlay 2006). In contrast to *S. multivorans*, cell extracts of *D. hafniense* Y51 exhibited low stability at 1% and even without oxygen. Probably due to this, *D. hafniense* Y51 cells did not

mediate PCE dechlorination in the presence of oxygen. Another factor differentiating *S. multivorans* from *D. hafniense* Y51 is the presence of different terminal oxidases, which might cause the faster oxygen consumption rate in *S. multivorans* cell extracts. This possibly contributes to the ability of only *S. multivorans* to dechlorinate PCE in the presence of oxygen.

Since the PCE respiratory chains of both organisms likely involve other redox-active proteins, it is conceivable that these are even more oxygen-sensitive than PceA. This might apply to the PCE-induced putative quinol dehydrogenase of *S. multivorans* (Goris et al. 2015), since the amino acid sequence of its periplasmic subunit indicates the presence of four [4Fe-4S] cluster-binding motifs (Goris et al. 2014). The fact that reductive dehalogenation was independent of the environmental redox potential up to +400 mV came as a surprise, as in general the redox potential suitable for supporting OHR was thought to be lower. Whether reductive dehalogenation is mediated at high redox potentials due to *S. multivorans* actively lowering the periplasmic potential or whether reductive dehalogenation itself is independent of the redox potential cannot be concluded here.

## CONCLUSION

With the current study, we showed that *Sulfurospirillum multivorans* can dechlorinate PCE in the presence of oxygen concentrations equal to or below 0.19 mg/L (0.5% in the gas phase) in contrast to the anaerobic bacterium *Desulfotobacterium hafniense* Y51. The proteomic response of *S. multivorans* to oxygen revealed two main enzymes that are upregulated as a stress response when the organism respire oxygen, an SOR and a hydrogen peroxide reductase. A constitutively expressed terminal oxidase might be one reason for the PCE respiration ability in the presence of oxygen. The findings of this study are important in studies on reductive dehalogenation in oxic-anoxic zones and give first clues into the proteomic response of microaerobic Epsilonproteobacteria to oxygen.

## SUPPLEMENTARY DATA

Supplementary data are available at [FEMSEC](https://academic.oup.com/femsec) online.

## ACKNOWLEDGEMENT

Benjamin Scheer is gratefully acknowledged for technical assistance and maintenance of the Orbitrap Fusion mass spectrometer. We thank Bernhard Schink (University of Konstanz) for lending his potentiostat and Manfred Rudolph (FSU Jena) for helpful comments on redox electrodes and the potentiostat. We appreciate the help of Nicole Engert-Ellenberger from the Microbial Immunology group at the Hans Knöll Institute in Jena during the work with their hypoxystation.

## FUNDING

This work was supported by the German Research Foundation (DFG), as part of the research unit FOR 1530. The authors used the analytical facilities of the Centre for Chemical Microscopy (ProVIS) at the Helmholtz Centre for Environmental Research, which is supported by European Regional Development Funds (EFRE—Europe funds Saxony) and the Helmholtz Association.

**Conflict of interest.** None declared.

## REFERENCES

- Amos BK, Ritalahti KM, Cruz-Garcia C et al. Oxygen effect on *Dehalococcoides* viability and biomarker quantification. *Environ Sci Technol* 2008;**42**:5718–26.
- Atack JM, Kelly DJ. Structure, mechanism and physiological roles of bacterial cytochrome c peroxidases. *Adv Microb Physiol* 2007;**52**:73–106.
- Atashgahi S, Lu Y, Smidt H. Overview of known organohalide-respiring bacteria—phylogenetic diversity and environmental distribution. In: Adrian L, Löffler F (eds) *Organohalide-Respiring Bacteria*. Berlin, Heidelberg, Germany: Springer, 2016.
- Bommer M, Kunze C, Fessler J et al. Structural basis for organohalide respiration. *Science* 2014;**346**:455–8.
- Bondarenko PV, Chelius D, Shaler TA. Identification and relative quantitation of protein mixtures by enzymatic digestion followed by capillary reversed-phase liquid chromatography-tandem mass spectrometry. *Anal Chem* 2002;**74**:4741–9.
- Borisov V, Gennis R, Hemp J et al. The cytochrome *bd* respiratory oxygen reductases. *Biochim Biophys Acta* 2011;**1807**:1398–413.
- Bradford MM. A rapid and sensitive method for the quantitation of microGram quantities of protein utilizing the principle of protein-dye binding. *Anal Biochem* 1976;**72**:248–54.
- Chen K, Huang L, Xu C et al. Molecular characterization of the enzymes involved in the degradation of a brominated aromatic herbicide. *Mol Microbiol* 2013;**89**:1121–39.
- Chen K, Jian S, Huang L et al. Reductive dehalogenation of 3,5-dibromo-4-hydroxybenzoate by an aerobic strain of *Delftia* sp. EOB-17. *Biotechnol Lett* 2015;**37**:2395–401.
- Coleman NV, Mattes TE, Gossett JM et al. Biodegradation of cis-dichloroethene as the sole carbon source by a beta-proteobacterium. *Appl Environ Microb* 2002;**68**:2726–30.
- Ezraty B, Gennaris A, Barras F et al. Oxidative stress, protein damage and repair in bacteria. *Nat Rev Microbiol* 2017;**15**:385–96.
- Fetzner S. Bacterial dehalogenation. *Appl Microbiol Biot* 1998;**50**:633–57.
- Goris T, Schiffmann CL, Gadkari J et al. Proteomic data set of the organohalide-respiring Epsilonproteobacterium *Sulfurospirillum multivorans* adapted to tetrachloroethene and other energy substrates. *Data Brief* 2016;**8**:637–42.
- Goris T, Schiffmann CL, Gadkari J et al. Proteomics of the organohalide-respiring Epsilonproteobacterium *Sulfurospirillum multivorans* adapted to tetrachloroethene and other energy substrates. *Sci Rep* 2015;**5**:13794.
- Goris T, Schubert T, Gadkari J et al. Insights into organohalide respiration and the versatile catabolism of *Sulfurospirillum multivorans* gained from comparative genomics and physiological studies. *Environ Microbiol* 2014;**16**:3562–80.
- Holliger C, Wohlfarth G, Diekert G. Reductive dechlorination in the energy metabolism of anaerobic bacteria. *FEMS Microbiol Rev* 1998;**22**:383–98.
- Imlay JA. Iron-sulphur clusters and the problem with oxygen. *Mol Microbiol* 2006;**59**:1073–82.
- Imlay JA. The molecular mechanisms and physiological consequences of oxidative stress: lessons from a model bacterium. *Nat Rev Microbiol* 2013;**11**:443–54.
- John M, Rubick R, Schmitz RP et al. Retentive memory of bacteria: Long-term regulation of dehalorespiration in *Sulfurospirillum multivorans*. *J Bacteriol* 2009;**191**:1650–5.
- Kim SH, Harzman C, Davis JK et al. Genome sequence of *Desulfotobacterium hafniense* DCB-2, a Gram-positive anaerobe

- capable of dehalogenation and metal reduction. *BMC Microbiol* 2012;**12**:21.
- Kästner M. Reductive dechlorination of Tri- and tetrachloroethylenes depends on transition from aerobic to anaerobic conditions. *Appl Environ Microb* 1991;**57**:2039–46.
- La Carbona S, Sauvageot N, Giard JC et al. Comparative study of the physiological roles of three peroxidases (NADH peroxidase, Alkyl hydroperoxide reductase and Thiol peroxidase) in oxidative stress response, survival inside macrophages and virulence of *Enterococcus faecalis*. *Mol Microbiol* 2007;**66**:1148–63.
- Leys D, Adrian L, Smidt H. Organohalide respiration: microbes breathing chlorinated molecules. *Philos T R Soc B* 2013;**368**:20120316.
- Mac Nelly A, Kai M, Svatoš A et al. Functional heterologous production of reductive dehalogenases from *Desulfitobacterium hafniense* strains. *Appl Environ Microb* 2014;**80**:4313–22
- Madsen T, Licht D. Isolation and characterization of an anaerobic chlorophenol-transforming bacterium. *Appl Environ Microb* 1992;**58**:2874–8.
- Mattes TE, Alexander AK, Coleman NV. Aerobic biodegradation of the chloroethenes: pathways, enzymes, ecology, and evolution. *FEMS Microbiol Rev* 2010;**34**:445–75.
- Moran MJ, Zogorski JS, Squillace PJ. Chlorinated solvents in groundwater of the United States. *Environ Sci Technol* 2007;**41**:74–81.
- Neumann A, Wohlfarth G, Diekert G. Purification and characterization of tetrachloroethene reductive dehalogenase from *Dehalospirillum multivorans*. *J Biol Chem* 1996;**271**:16515–9.
- Pitcher RS, Brittain NJ, Watmugh NJ. Cytochrome *cbb3* oxidase and bacterial microaerobic metabolism. *Biochem Soc Trans* 2002;**30**:653–8
- Sanford R, Cole J, Tiedje J. Characterization and description of *Anaeromyxobacter dehalogenans* gen. nov., sp. nov., an arylhalorespiring facultative anaerobic myxobacterium. *Appl Environ Microb* 2002;**68**:893–900.
- Scholz-Muramatsu H, Neumann A, Messmer M et al. Isolation and characterization of *Dehalospirillum multivorans* gen. nov., sp. nov., a tetrachloroethene-utilizing, strictly anaerobic bacterium. *Arch Microbiol* 1995;**163**:48–56.
- Schubert T, Diekert G. Comparative biochemistry of organohalide respiration. In: Adrian L, Löffler F (eds) *Organohalide-Respiring Bacteria*. Berlin, Heidelberg, Germany: Springer, 2016.
- Sheng Y, Abreu IA, Cabelli DE et al. Superoxide dismutases and superoxide reductases. *Chem Rev* 2014;**114**:3854–918.
- Thomas S, Wagner R, Arakaki A et al. The mosaic genome of *Anaeromyxobacter dehalogenans* strain 2CP-C suggests an aerobic common ancestor to the Delta- Proteobacteria. *Plos One* 2008;**3**:e2013.
- Utkin I, Woese C, Wiegel J. Isolation and characterization of *Desulfitobacterium dehalogenans* gen. nov., sp. nov., an anaerobic bacterium which reductively dechlorinates chlorophenolic compounds. *Int J Syst Bacteriol* 1994;**44**:612–9.
- van Pée K, Unversucht S. Biological dehalogenation and halogenation reactions. *Chemosphere* 2003;**52**:299–312.
- Wood ZA, Schröder E, Robin Harris J et al. Structure, mechanism and regulation of peroxiredoxins. *Trends Biochem Sci* 2003;**28**:32–40.
